# Supplementary material for: p53 deficiency linked to B cell translocation gene 2 (BTG2) loss enhances metastatic potential by promoting tumor growth in primary and metastatic sites in patient-derived xenograft (PDX) models of triple-negative breast cancer
Source: PubMed Central journal article supplement (PMC4728775; doi:10.1186/s13058-016-0673-9), 2016-01-27
Supplement: 13058_2016_673_MOESM1_ESM.pdf [file 13058_2016_673_MOESM1_ESM.pdf]

Table S3. Mini-signature of genes that interact with the p53 pathway and associated p-values.

| <b>p53 associated genes</b> | <b>TCGA cohort (all breast cancer) Overall Survival (n=1022)</b> | <b>TCGA cohort (TNBC) overall survival (n=119)</b> | <b>San Diego cohort (metastasis free survival) (n=286)</b> | <b>NKI cohort (metastasis free survival) (n=295)</b> | <b>Oxford cohort (metastasis free survival) (n=210)</b> |
|-----------------------------|------------------------------------------------------------------|----------------------------------------------------|------------------------------------------------------------|------------------------------------------------------|---------------------------------------------------------|
| GDF15                       | 0.618704                                                         | 0.872751                                           | 0.512639                                                   | NA                                                   | NA                                                      |
| SPATA18                     | 0.931971                                                         | 0.909813                                           | NA                                                         | NA                                                   | NA                                                      |
| FAM27A                      | 0.795673                                                         | 0.738823                                           | NA                                                         | NA                                                   | NA                                                      |
| BTG2                        | 0.000866                                                         | 0.125703                                           | 0.181338                                                   | 0.000003                                             | 0.000168                                                |
| CA9                         | 0.429666                                                         | 0.538078                                           | 0.318494                                                   | 0.001134                                             | 0.000787                                                |
| TP53                        | 0.406990                                                         | 0.717982                                           | 0.892629                                                   | 0.902928                                             | 0.748604                                                |
| EDA2R                       | 0.003220                                                         | 0.493069                                           | 0.517135                                                   | NA                                                   | NA                                                      |
| NME1                        | 0.394788                                                         | 0.386684                                           | 0.043214                                                   | 0.124441                                             | 0.020291                                                |
| NME2                        | 0.017816                                                         | 0.401633                                           | NA                                                         | 0.407861                                             | 0.164076                                                |
| TNFRSF1B                    | 0.030622                                                         | 0.737269                                           | 0.014245                                                   | 0.967189                                             | 0.655479                                                |
| ACTA2                       | 0.128326                                                         | 0.584963                                           | 0.010685                                                   | 0.759370                                             | 0.633141                                                |
| PRAP1                       | 0.179881                                                         | 0.469873                                           | NA                                                         | NA                                                   | NA                                                      |
| DSG3                        | 0.015148                                                         | 0.281834                                           | 0.661268                                                   | 0.404740                                             | 0.734274                                                |
| EDIL3                       | 0.019433                                                         | 0.253810                                           | 0.138877                                                   | 0.491648                                             | 0.323478                                                |
| BHLHE41                     | 0.192112                                                         | 0.463182                                           | 0.868209                                                   | NA                                                   | NA                                                      |
| MMP2                        | 0.744432                                                         | 0.927997                                           | 0.779695                                                   | 0.607070                                             | 0.558907                                                |
| PCDH7                       | 0.527964                                                         | 0.473452                                           | 0.718918                                                   | 0.506622                                             | 0.990493                                                |
| THBS1                       | 0.027219                                                         | 0.234703                                           | 0.260597                                                   | 0.413557                                             | 0.092741                                                |
| PTX3                        | 0.237603                                                         | 0.747768                                           | 0.089691                                                   | 0.659664                                             | 0.746536                                                |
| SEMA3A                      | 0.472948                                                         | 0.127119                                           | 0.057343                                                   | 0.955063                                             | 0.500024                                                |
| LUM                         | 0.577808                                                         | 0.320572                                           | 0.436260                                                   | 0.060627                                             | 0.726615                                                |
| EPHA4                       | 0.527416                                                         | 0.561032                                           | 0.682572                                                   | 0.121261                                             | 0.144562                                                |
| KRT14                       | 0.002357                                                         | 0.723528                                           | 0.387805                                                   | 0.700514                                             | 0.561103                                                |
| TNFSF14                     | 0.216639                                                         | 0.738366                                           | 0.820042                                                   | 0.708935                                             | 0.602292                                                |
| NLRP3                       | 0.276127                                                         | 0.994360                                           | 0.876382                                                   | NA                                                   | NA                                                      |
| IGFBP7                      | 0.098384                                                         | 0.903900                                           | 0.071742                                                   | 0.828768                                             | 0.605262                                                |
| SP7                         | 0.071958                                                         | 0.034029                                           | NA                                                         | NA                                                   | 0.451514                                                |
| MMP16                       | 0.275221                                                         | 0.149805                                           | 0.475863                                                   | 0.439643                                             | 0.277535                                                |
| ZACN                        | 0.113341                                                         | 0.285311                                           | NA                                                         | NA                                                   | NA                                                      |
| RUNX2                       | 0.190225                                                         | 0.257235                                           | 0.362197                                                   | 0.901616                                             | 0.616612                                                |
| PAK6                        | 0.046595                                                         | 0.367752                                           | 0.684316                                                   | 0.669276                                             | 0.328800                                                |

\*Red shading indicates significant p-value
