# Supplementary material for: p53 deficiency linked to B cell translocation gene 2 (BTG2) loss enhances metastatic potential by promoting tumor growth in primary and metastatic sites in patient-derived xenograft (PDX) models of triple-negative breast cancer
Source: PubMed Central journal article supplement (PMC4728775; doi:10.1186/s13058-016-0673-9), 2016-01-27

A

|                                                              | Number of cells implanted | Number of BC3-p53WT tumors developed | Number of BC3-p53KD tumors developed |
|--------------------------------------------------------------|---------------------------|--------------------------------------|--------------------------------------|
| Number of tumor cells injected co-implanted with fibroblasts | 10 cells                  | 10/10                                | 10/10                                |
|                                                              | 100 cells                 | 8/8                                  | 10/10                                |
|                                                              | 1,000 cells               | 4/4                                  | 4/4                                  |
|                                                              | 10,000 cells              | 4/4                                  | 4/4                                  |
| Number of tumor cells implanted in absence of fibroblasts    | 10 cells                  | 6/6                                  | 5/6                                  |
|                                                              | 100 cells                 | 4/4                                  | 4/4                                  |

B

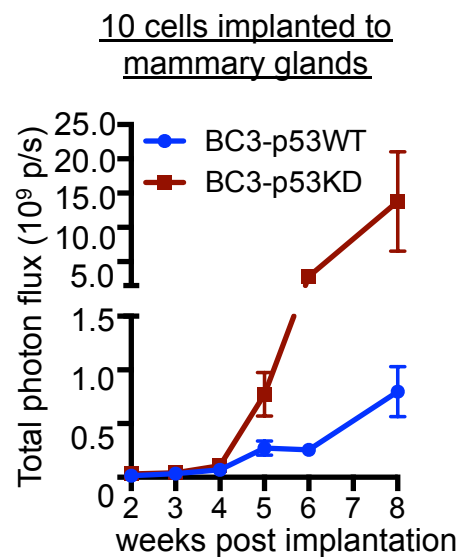

C

Primary mammosphere formation

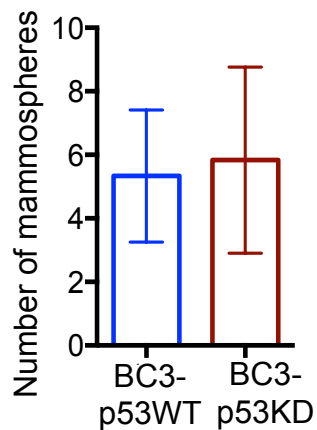

D

Secondary mammosphere formation

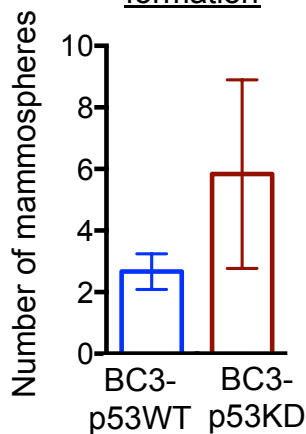

E

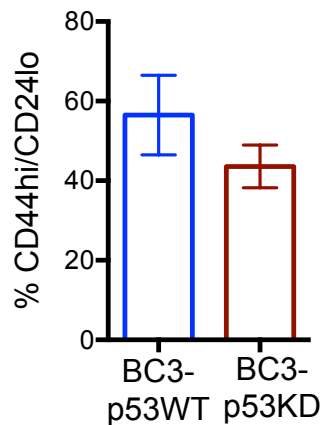

Supplement: 13058_2016_673_MOESM3_ESM.pdf [file 13058_2016_673_MOESM3_ESM.pdf]
