# Supplementary material for: p53 deficiency linked to B cell translocation gene 2 (BTG2) loss enhances metastatic potential by promoting tumor growth in primary and metastatic sites in patient-derived xenograft (PDX) models of triple-negative breast cancer
Source: PubMed Central journal article supplement (PMC4728775; doi:10.1186/s13058-016-0673-9), 2016-01-27

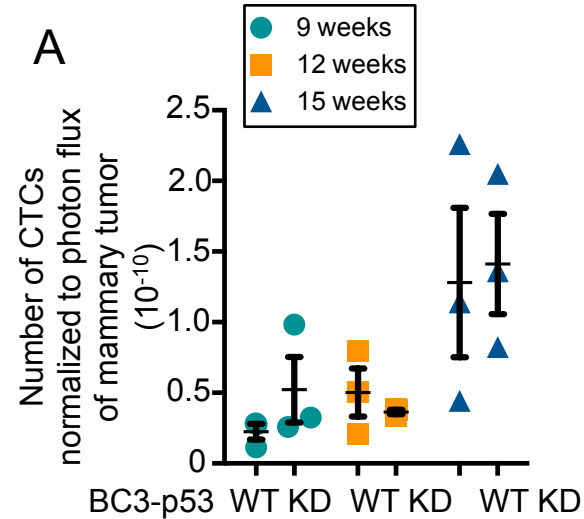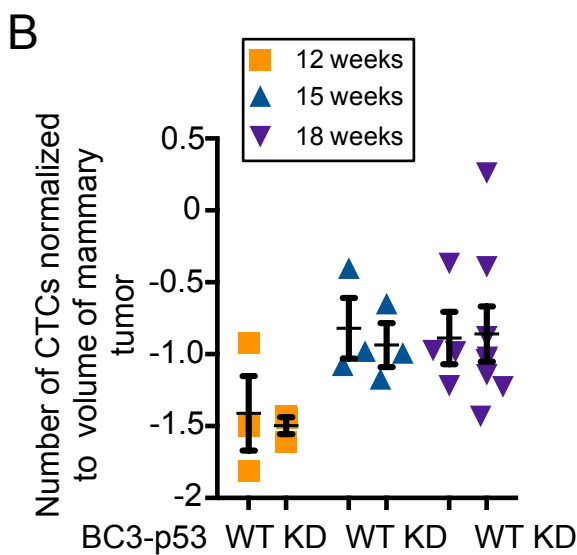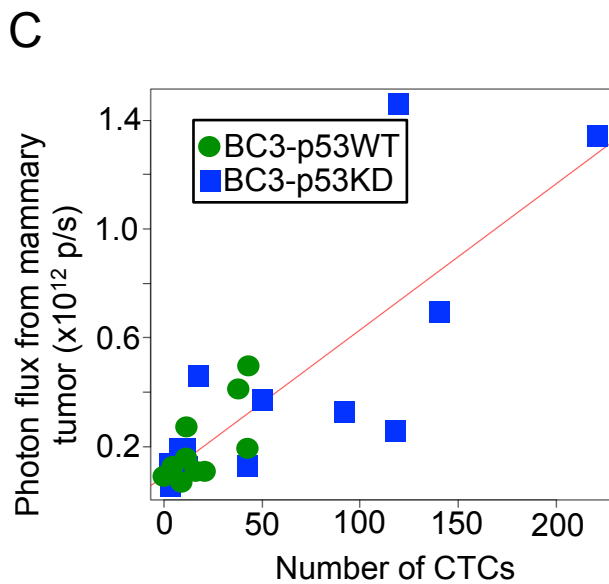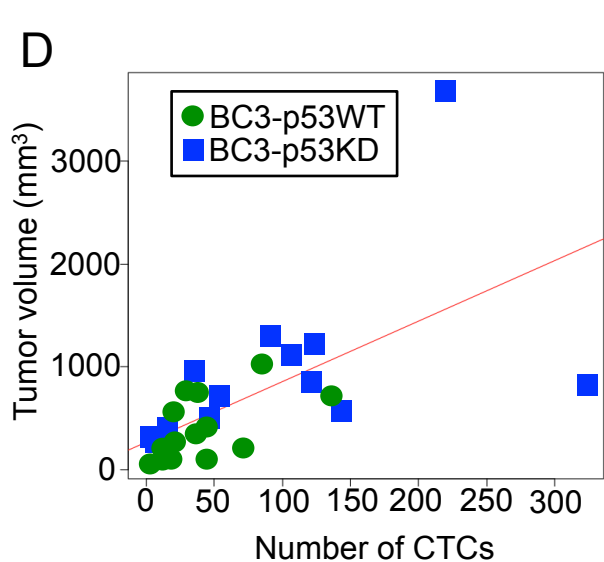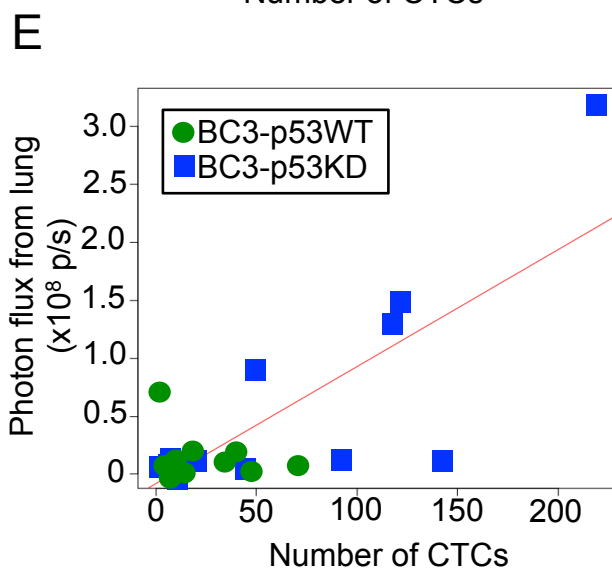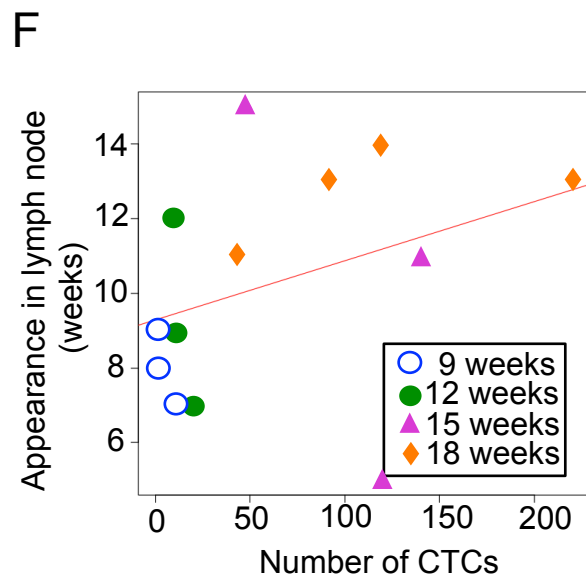

Supplement: 13058_2016_673_MOESM5_ESM.pdf [file 13058_2016_673_MOESM5_ESM.pdf]
