# Supplementary material for: p53 deficiency linked to B cell translocation gene 2 (BTG2) loss enhances metastatic potential by promoting tumor growth in primary and metastatic sites in patient-derived xenograft (PDX) models of triple-negative breast cancer
Source: PubMed Central journal article supplement (PMC4728775; doi:10.1186/s13058-016-0673-9), 2016-01-27
Supplement: 13058_2016_673_MOESM6_ESM.pdf [file 13058_2016_673_MOESM6_ESM.pdf]

Table S1. RNA-Seq signature of genes that are de-regulated upon p53 loss in BC3 mammary tumors

| <b>BC3-p53WT vs. BC3-p53KD mammary tumor gene expression signature</b> |                                |                                  |                                          |                                                                      |
|------------------------------------------------------------------------|--------------------------------|----------------------------------|------------------------------------------|----------------------------------------------------------------------|
| <b><u>Gene Symbol</u></b>                                              | <b><u>log2 Fold Change</u></b> | <b><u>actual fold change</u></b> | <b><u>pvalue (Wald test p-value)</u></b> | <b><u>expression increased or decreased when p53 is silenced</u></b> |
| TP53                                                                   | 3.4                            | 10.9                             | 7.84E-30                                 | decreased                                                            |
| SGCZ                                                                   | 3.3                            | 9.9                              | 6.36E-07                                 | decreased                                                            |
| NARR                                                                   | 3.2                            | 9.5                              | 6.33E-07                                 | decreased                                                            |
| INPP5D                                                                 | 3.0                            | 7.7                              | 3.72E-13                                 | decreased                                                            |
| EDA2R                                                                  | 2.8                            | 7.2                              | 1.23E-09                                 | decreased                                                            |
| MIR3655                                                                | 2.7                            | 6.4                              | 1.73E-05                                 | decreased                                                            |
| RAD51L3-RFFL                                                           | 2.5                            | 5.5                              | 2.29E-04                                 | decreased                                                            |
| LINC01021                                                              | 2.3                            | 5.0                              | 7.07E-05                                 | decreased                                                            |
| SLC22A11                                                               | 2.1                            | 4.3                              | 4.63E-05                                 | decreased                                                            |
| CA9                                                                    | 2.1                            | 4.2                              | 8.08E-06                                 | decreased                                                            |
| ABCC6P1                                                                | 2.0                            | 4.0                              | 3.08E-03                                 | decreased                                                            |
| TREML3P                                                                | 2.0                            | 4.0                              | 1.05E-04                                 | decreased                                                            |
| PPP1R14D                                                               | 2.0                            | 4.0                              | 4.05E-04                                 | decreased                                                            |
| GABRG1                                                                 | 2.0                            | 3.9                              | 3.80E-03                                 | decreased                                                            |
| ADAM21                                                                 | 1.9                            | 3.8                              | 2.55E-03                                 | decreased                                                            |
| C19orf83                                                               | 1.9                            | 3.7                              | 1.00E-04                                 | decreased                                                            |
| ANP32D                                                                 | 1.9                            | 3.7                              | 5.00E-03                                 | decreased                                                            |
| SPATA18                                                                | 1.8                            | 3.6                              | 4.52E-04                                 | decreased                                                            |
| GDF15                                                                  | 1.8                            | 3.5                              | 2.30E-08                                 | decreased                                                            |
| CCDC178                                                                | 1.8                            | 3.4                              | 8.87E-03                                 | decreased                                                            |
| C18orf56                                                               | 1.8                            | 3.4                              | 1.57E-04                                 | decreased                                                            |
| VWCE                                                                   | 1.8                            | 3.4                              | 4.55E-03                                 | decreased                                                            |
| CECR7                                                                  | 1.8                            | 3.4                              | 1.83E-04                                 | decreased                                                            |
| TMEM82                                                                 | 1.7                            | 3.4                              | 2.32E-03                                 | decreased                                                            |
| SLC51B                                                                 | 1.7                            | 3.3                              | 3.44E-04                                 | decreased                                                            |
| APOC1                                                                  | 1.7                            | 3.2                              | 7.64E-04                                 | decreased                                                            |
| PSG3                                                                   | 1.7                            | 3.2                              | 9.60E-05                                 | decreased                                                            |
| ARX                                                                    | 1.7                            | 3.1                              | 6.23E-03                                 | decreased                                                            |
| ZNF141                                                                 | 1.6                            | 3.1                              | 1.15E-02                                 | decreased                                                            |
| HABP2                                                                  | 1.6                            | 3.1                              | 1.08E-02                                 | decreased                                                            |
| CD163                                                                  | 1.6                            | 3.1                              | 1.70E-02                                 | decreased                                                            |
| CREB3L1                                                                | 1.6                            | 3.0                              | 8.32E-03                                 | decreased                                                            |
| ADORA1                                                                 | 1.6                            | 3.0                              | 3.38E-04                                 | decreased                                                            |

|              |     |     |          |           |
|--------------|-----|-----|----------|-----------|
| VSIG10L      | 1.6 | 3.0 | 5.63E-04 | decreased |
| FAM27A       | 1.6 | 3.0 | 2.87E-03 | decreased |
| NDUFA4L2     | 1.5 | 2.9 | 2.54E-03 | decreased |
| RPS14P3      | 1.5 | 2.9 | 6.64E-03 | decreased |
| WNT10B       | 1.5 | 2.9 | 2.39E-04 | decreased |
| EIF4EBP3     | 1.5 | 2.9 | 6.72E-03 | decreased |
| TNFRSF1B     | 1.5 | 2.9 | 2.33E-03 | decreased |
| BTG2         | 1.5 | 2.9 | 1.92E-05 | decreased |
| NME1-NME2    | 1.5 | 2.8 | 2.51E-02 | decreased |
| ACTA2        | 1.5 | 2.8 | 3.00E-04 | decreased |
| CACNA2D4     | 1.5 | 2.8 | 2.48E-03 | decreased |
| PRAP1        | 1.5 | 2.8 | 5.81E-03 | decreased |
| ASGR2        | 1.5 | 2.8 | 7.71E-03 | decreased |
| PALD1        | 1.5 | 2.8 | 2.41E-03 | decreased |
| BATF2        | 1.5 | 2.8 | 8.63E-03 | decreased |
| LINC00261    | 1.5 | 2.7 | 1.59E-02 | decreased |
| LOC102467081 | 1.5 | 2.7 | 2.73E-02 | decreased |
| RPL22L1      | 1.5 | 2.7 | 1.00E-02 | decreased |
| DSG3         | 3.2 | 9.0 | 3.63E-10 | increased |
| ISPD         | 2.7 | 6.7 | 3.41E-05 | increased |
| DDX11L9      | 2.7 | 6.5 | 7.16E-05 | increased |
| ITGB8        | 2.6 | 5.9 | 2.53E-06 | increased |
| EDIL3        | 2.6 | 5.9 | 3.05E-05 | increased |
| PKP1         | 2.6 | 5.9 | 1.07E-04 | increased |
| HOXC11       | 2.4 | 5.1 | 1.88E-04 | increased |
| KLF8         | 2.3 | 5.1 | 2.26E-05 | increased |
| BHLHE41      | 2.3 | 5.0 | 1.96E-04 | increased |
| EPB41L3      | 2.3 | 4.9 | 2.15E-04 | increased |
| CLIC6        | 2.2 | 4.5 | 1.24E-03 | increased |
| MMP2         | 2.1 | 4.4 | 1.08E-04 | increased |
| NTS          | 2.1 | 4.4 | 1.59E-03 | increased |
| MB21D1       | 2.1 | 4.4 | 1.72E-03 | increased |
| LRRTM3       | 2.1 | 4.2 | 2.03E-03 | increased |
| PRR16        | 2.1 | 4.2 | 1.99E-03 | increased |
| BLACAT1      | 2.0 | 4.1 | 1.11E-04 | increased |
| NPM2         | 2.0 | 4.1 | 2.41E-03 | increased |
| PCDH1        | 2.0 | 4.0 | 5.26E-05 | increased |
| C10orf10     | 2.0 | 4.0 | 1.77E-04 | increased |
| MFAP5        | 2.0 | 4.0 | 3.54E-04 | increased |
| PTX3         | 2.0 | 3.9 | 3.92E-03 | increased |
| PCBP3        | 1.9 | 3.8 | 2.04E-03 | increased |

|           |     |     |          |           |
|-----------|-----|-----|----------|-----------|
| C15orf56  | 1.9 | 3.8 | 4.11E-03 | increased |
| TM4SF18   | 1.9 | 3.8 | 4.79E-03 | increased |
| KRT6A     | 1.9 | 3.8 | 1.74E-03 | increased |
| SERPINA3  | 1.9 | 3.7 | 4.88E-04 | increased |
| ACTL8     | 1.9 | 3.7 | 1.86E-03 | increased |
| CCL28     | 1.9 | 3.6 | 6.01E-04 | increased |
| MAP3K7CL  | 1.8 | 3.6 | 1.74E-03 | increased |
| FAP       | 1.8 | 3.6 | 3.35E-03 | increased |
| ARID5B    | 1.8 | 3.6 | 1.83E-03 | increased |
| SMIM10    | 1.8 | 3.5 | 7.20E-03 | increased |
| SEMA3A    | 1.8 | 3.5 | 4.48E-04 | increased |
| LOX       | 1.8 | 3.5 | 2.60E-06 | increased |
| STL       | 1.8 | 3.5 | 5.99E-03 | increased |
| LINGO2    | 1.8 | 3.4 | 5.87E-03 | increased |
| RPS6KA2   | 1.8 | 3.4 | 1.38E-03 | increased |
| GAS6-AS2  | 1.8 | 3.4 | 4.20E-03 | increased |
| ACTR3C    | 1.8 | 3.4 | 8.44E-03 | increased |
| TSPY26P   | 1.8 | 3.4 | 7.32E-03 | increased |
| LUM       | 1.7 | 3.4 | 1.24E-03 | increased |
| ZNF608    | 1.7 | 3.3 | 1.99E-03 | increased |
| GJA1      | 1.7 | 3.3 | 3.88E-03 | increased |
| MMP19     | 1.7 | 3.3 | 8.96E-03 | increased |
| EPHA4     | 1.7 | 3.3 | 2.35E-03 | increased |
| SPOCK3    | 1.7 | 3.3 | 9.60E-03 | increased |
| EPHX4     | 1.7 | 3.3 | 3.01E-03 | increased |
| CLIC5     | 1.7 | 3.3 | 2.78E-03 | increased |
| GPR110    | 1.7 | 3.2 | 8.80E-03 | increased |
| HOTAIR    | 1.7 | 3.2 | 1.27E-02 | increased |
| MAOB      | 1.7 | 3.2 | 3.53E-03 | increased |
| MMP7      | 1.7 | 3.2 | 1.33E-03 | increased |
| PRKACB    | 1.7 | 3.2 | 6.96E-05 | increased |
| RIMS1     | 1.7 | 3.2 | 1.34E-02 | increased |
| TMPRSS4   | 1.7 | 3.2 | 1.20E-03 | increased |
| KRT14     | 1.7 | 3.2 | 9.22E-03 | increased |
| TNFSF14   | 1.7 | 3.2 | 1.11E-02 | increased |
| NLRP3     | 1.7 | 3.2 | 9.49E-03 | increased |
| TMEFF2    | 1.7 | 3.1 | 1.47E-02 | increased |
| EDAR      | 1.6 | 3.1 | 1.86E-03 | increased |
| CCDC85A   | 1.6 | 3.1 | 2.34E-04 | increased |
| DUSP27    | 1.6 | 3.1 | 1.50E-02 | increased |
| LOC340113 | 1.6 | 3.1 | 1.56E-02 | increased |

|              |     |     |          |           |
|--------------|-----|-----|----------|-----------|
| LOC100379224 | 1.6 | 3.1 | 4.11E-03 | increased |
| FHOD3        | 1.6 | 3.1 | 1.45E-03 | increased |
| IGFBP7       | 1.6 | 3.1 | 4.47E-03 | increased |
| POU4F3       | 1.6 | 3.0 | 1.83E-02 | increased |
| BMP6         | 1.6 | 3.0 | 7.39E-04 | increased |
| SP7          | 1.6 | 3.0 | 1.59E-02 | increased |
| RFTN2        | 1.6 | 3.0 | 1.96E-02 | increased |
| KIAA1644     | 1.6 | 3.0 | 1.81E-02 | increased |
| PCDH7        | 1.6 | 3.0 | 6.14E-03 | increased |
| PELI1        | 1.6 | 3.0 | 2.62E-04 | increased |
| GRIK1        | 1.6 | 3.0 | 1.88E-02 | increased |
| MMP16        | 1.6 | 3.0 | 1.92E-02 | increased |
| MOV10L1      | 1.6 | 3.0 | 1.74E-02 | increased |
| HMCN1        | 1.6 | 3.0 | 1.92E-02 | increased |
| KCNA7        | 1.6 | 2.9 | 1.11E-02 | increased |
| MAML2        | 1.6 | 2.9 | 3.37E-04 | increased |
| ZNF57        | 1.5 | 2.9 | 1.19E-02 | increased |
| SOX8         | 1.5 | 2.9 | 1.79E-02 | increased |
| LINC00163    | 1.5 | 2.9 | 1.25E-02 | increased |
| THBS1        | 1.5 | 2.9 | 4.00E-03 | increased |
| LOC100129027 | 1.5 | 2.9 | 1.71E-02 | increased |
| MUC16        | 1.5 | 2.9 | 1.64E-02 | increased |
| GRIN3B       | 1.5 | 2.8 | 2.77E-03 | increased |
| GHRLOS       | 1.5 | 2.8 | 2.55E-02 | increased |
| ROBO1        | 1.5 | 2.8 | 1.99E-02 | increased |
| C4orf26      | 1.5 | 2.8 | 1.74E-02 | increased |
| ZACN         | 1.5 | 2.8 | 2.65E-02 | increased |
| FGB          | 1.5 | 2.8 | 1.66E-02 | increased |
| RNF165       | 1.5 | 2.8 | 2.89E-02 | increased |
| SLC16A7      | 1.5 | 2.8 | 5.92E-03 | increased |
| CCL24        | 1.5 | 2.8 | 1.59E-02 | increased |
| DNAH10       | 1.5 | 2.8 | 1.53E-02 | increased |
| RUNX2        | 1.5 | 2.8 | 2.79E-02 | increased |
| SLITRK6      | 1.5 | 2.8 | 2.80E-02 | increased |
| IRAK3        | 1.5 | 2.8 | 3.02E-02 | increased |
| PITPNM3      | 1.5 | 2.8 | 9.39E-03 | increased |
| RYR2         | 1.5 | 2.8 | 2.97E-02 | increased |
| B3GNT6       | 1.5 | 2.8 | 1.61E-02 | increased |
| PAK6         | 1.5 | 2.8 | 2.08E-03 | increased |
| PLCL1        | 1.5 | 2.8 | 2.46E-02 | increased |
| JAM2         | 1.5 | 2.8 | 2.65E-02 | increased |

|           |     |     |          |           |
|-----------|-----|-----|----------|-----------|
| SH3TC2    | 1.5 | 2.8 | 9.77E-03 | increased |
| UBOX5-AS1 | 1.5 | 2.7 | 2.94E-02 | increased |
| SOX21-AS1 | 1.5 | 2.7 | 3.17E-02 | increased |
| HR        | 1.5 | 2.7 | 9.98E-03 | increased |
