# Supplementary material for: p53 deficiency linked to B cell translocation gene 2 (BTG2) loss enhances metastatic potential by promoting tumor growth in primary and metastatic sites in patient-derived xenograft (PDX) models of triple-negative breast cancer
Source: Springer Nature journal article supplement (doi:10.1186/s13058-016-0673-9), 2016-01-27

A

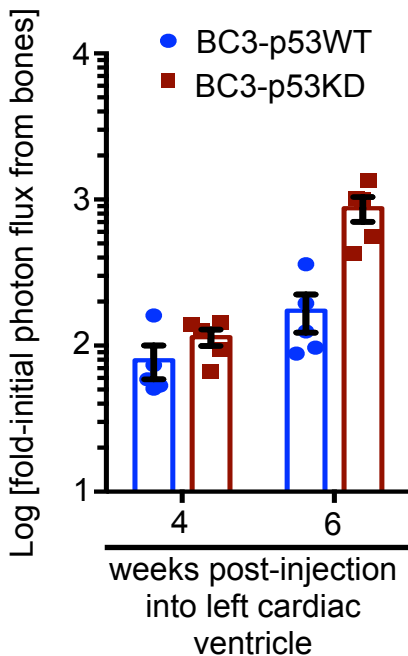

B

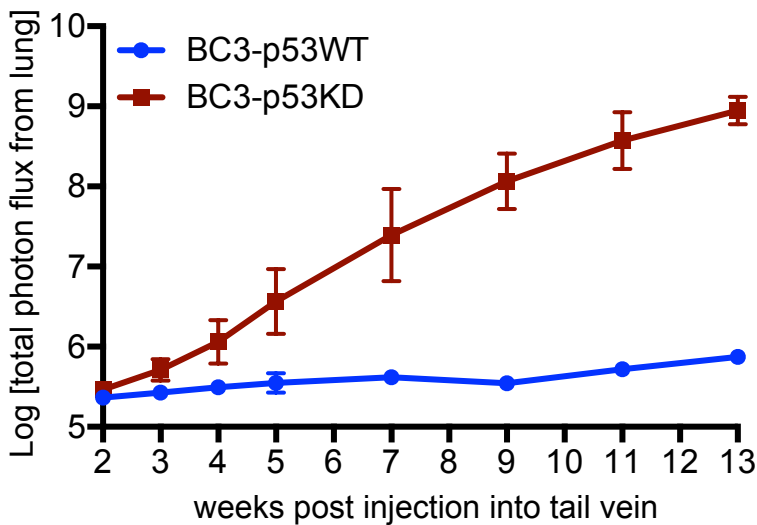

Supplement: MOESM4 [file 9781640]
