# Supplementary material for: p53 deficiency linked to B cell translocation gene 2 (BTG2) loss enhances metastatic potential by promoting tumor growth in primary and metastatic sites in patient-derived xenograft (PDX) models of triple-negative breast cancer
Source: Springer Nature journal article supplement (doi:10.1186/s13058-016-0673-9), 2016-01-27
Supplement: MOESM7 [file 9781640]

Table S2. Pathway analysis of RNA-Seq expression signature consisting of genes de-regulated upon p53 knockdown

| #  | Networks                                                           | Total | p-value       | FDR           | # genes in data | Genes Deregulated                                               |
|----|--------------------------------------------------------------------|-------|---------------|---------------|-----------------|-----------------------------------------------------------------|
| 1  | Proteolysis_ECM remodeling                                         | 85    | 9.426<br>E-06 | 5.314<br>E-04 | 7               | MMP-7, MMP-19, MMP-16, SPOCK3, SERPINA3, MMP-2, Lumican         |
| 2  | Proteolysis_Connective tissue degradation                          | 119   | 9.489<br>E-06 | 5.314<br>E-04 | 8               | MMP-7, MMP-19, MMP-16, SPOCK3, SERPINA3, MMP-2, Lumican, HABP2  |
| 3  | Cell adhesion_Cell-matrix interactions                             | 211   | 9.669<br>E-05 | 3.610<br>E-03 | 9               | MMP-7, MMP-19, GJA1, MMP-16, MMP-2, THBS1, Lumican, HABP2, SGCZ |
| 4  | Development_Neurogenesis_Synaptogenesis                            | 180   | 1.059<br>E-03 | 2.965<br>E-02 | 5               | RIMS1, GRIK1, THBS1, WNT10B, ACTA2                              |
| 5  | Apoptosis_Anti-apoptosis mediated by external signals via NF-κB    | 111   | 3.040<br>E-03 | 6.413<br>E-02 | 5               | PRKACB, RPS6KA2, p53, TNFRSF1B, ADORA1                          |
| 6  | Development_EMT_Regulation of epithelial-to-mesenchymal transition | 225   | 3.774<br>E-03 | 6.413<br>E-02 | 6               | KRT14, LOX, RPS6KA2, MMP-2, WNT10B, ACTA2                       |
| 7  | Development_Neurogenesis_Axonal guidance                           | 230   | 4.259<br>E-03 | 6.413<br>E-02 | 7               | EPHA4, CCL28, ROBO1, SEMA3A, PRKACB, ACTA2                      |
| 8  | Cell adhesion_Attractive and repulsive receptors                   | 175   | 4.581<br>E-03 | 6.413<br>E-02 | 6               | EPHA4, ROBO1, SEMA3A, PRKACB, ACTA2                             |
| 9  | Cell adhesion_Cadherins                                            | 180   | 5.252<br>E-03 | 6.512<br>E-02 | 6               | PKP1, DSG3, PCDH7, ACTA2, WNT10B                                |
| 10 | Cytoskeleton_Intermediate filaments                                | 81    | 5.814<br>E-03 | 6.512<br>E-02 | 4               | PKP1, KRT14, KRT6A, ACTA2                                       |

green text indicates up-regulation in response to p53 knockdown

red text indicates down-regulation in response to p53 knockdown
